# Supplementary material for: Synchronization of stochastic expressions drives the clustering of functionally related genes
Source: PubMed Central journal article supplement — Sci Adv. 2019 Oct 9;5(10):eaax6525. doi: 10.1126/sciadv.aax6525 (PMC6785257; doi:10.1126/sciadv.aax6525), 2019-10-09
Supplement: aax6525_SM.pdf [file aax6525_SM.pdf]

## Supplementary Materials for

### **Synchronization of stochastic expressions drives the clustering of functionally related genes**

Haiqing Xu, Jing-Jing Liu, Zhen Liu, Ying Li, Yong-Su Jin, Jianzhi Zhang\*

\*Corresponding author. Email: jianzhi@umich.edu

Published 9 October 2019, *Sci. Adv.* **5**, eaax6525 (2019)  
DOI: 10.1126/sciadv.aax6525

#### **This PDF file includes:**

Fig. S1. Simulation of the *GAL* pathway.

Fig. S2. Comparison of protein expression levels of *GAL* genes between cis- and trans-tagging strains.

Fig. S3. Flowchart showing the construction of cis- and trans-deletion strains for the pair of *GAL1* and *GAL10* genes.

Fig. S4. Ln(cell number ratio between the cis- and trans-deletion strains) as a function of competition time.

Table S1. Parameter values used in the simulation of the linear pathway with two reactions.

Table S2. Parameter values used in the simulation of the *GAL* pathway.

Table S3. Primers for strain construction.

Table S4. gRNA target sequences.

Table S5. Doubling times for various trans-deletion strains.

References (46–51)

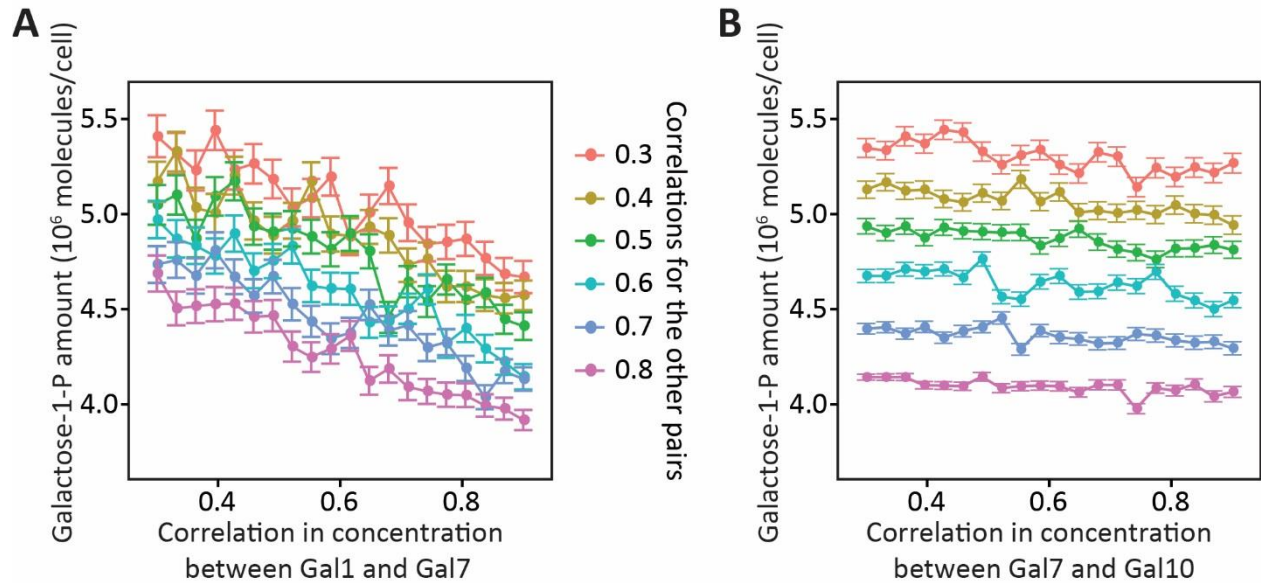

**Fig. S1. Simulation of the *GAL* pathway.** (A) Expected concentrations of galactose-1-P under different levels of correlation between the concentrations of Gal1 and Gal7, determined by non-steady state numerical simulations. The correlation coefficient in concentration between Gal1 and Gal10 and that between Gal7 and Gal10 are fixed at various levels indicated on the right of the figure. Each circle indicates the average from 2,000 simulations. Error bars show SEs. (B) Expected concentrations of galactose-1-P under different levels of correlation between the concentrations of Gal7 and Gal10, determined by non-steady state numerical simulations. The correlation coefficient in concentration between Gal1 and Gal10 and that between Gal1 and Gal7 are fixed at various levels indicated on the right of the figure. Each circle indicates the average from 10,000 simulations. Error bars show SEs.

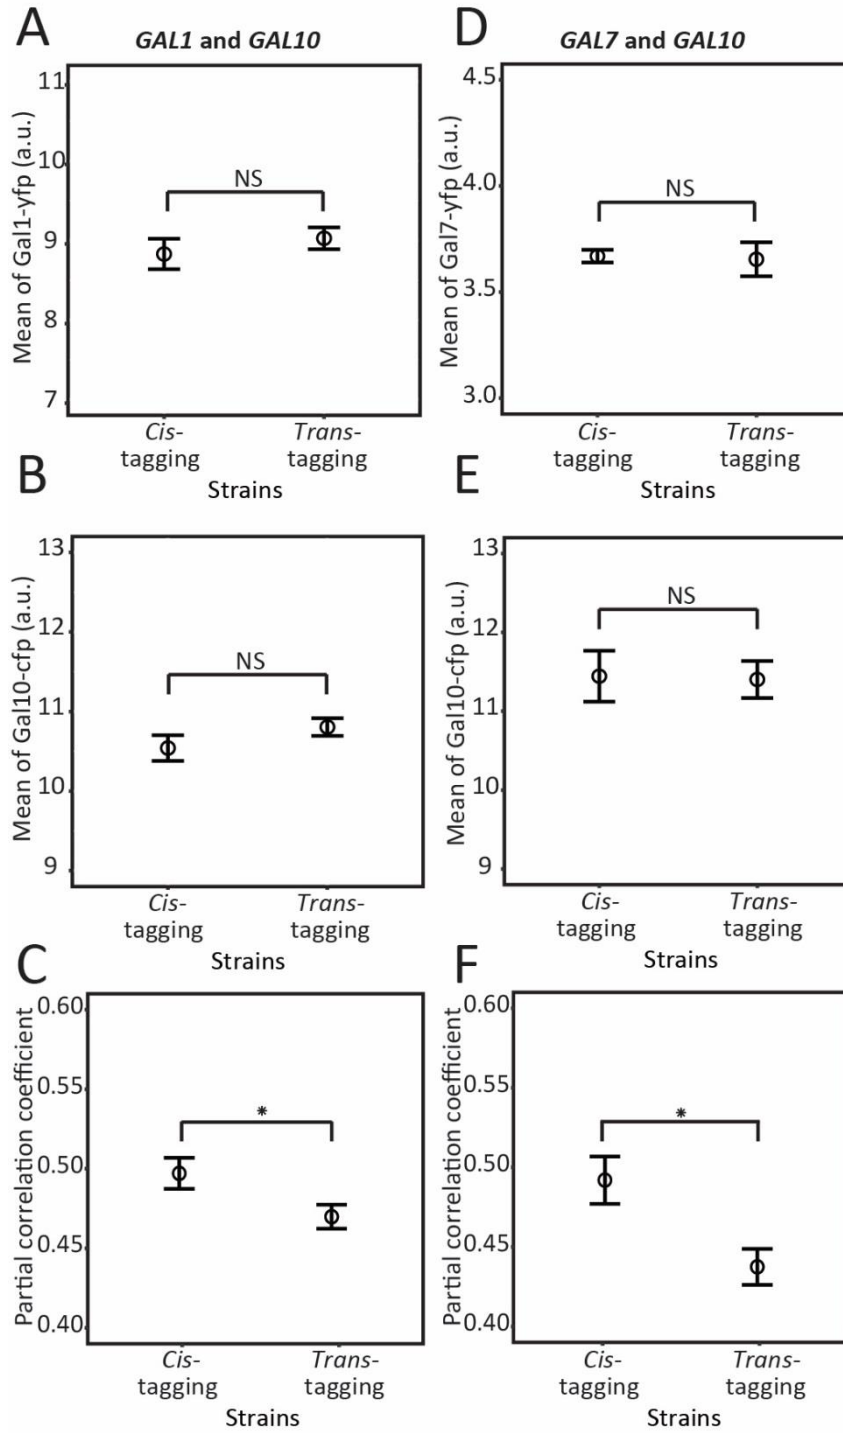

**Fig. S2. Comparison of protein expression levels of *GAL* genes between *cis*- and *trans*-tagging strains.** (A to C) Study of the pair of *GAL1* and *GAL10* genes. Mean Gal1-yfp (a) and mean Gal10-cfp (b) protein levels are not significantly different between *cis*- and *trans*-tagging strains, but the partial correlation between Gal1-yfp and Gal10-cfp protein levels among cells upon the control for cell morphology is significantly higher in the *cis*- than *trans*-tagging strains (c). (D to F) Study of the pair of *GAL7* and *GAL10* genes. Mean Gal7-yfp (d) and mean Gal10-cfp (e) protein levels are not significantly different between the *cis*- and *trans*-tagging strains, but the partial correlation between Gal7-yfp and Gal10-cfp protein levels among cells upon the control for cell morphology is significantly higher in the *cis*- than *trans*-tagging strains (f). In all panels, each circle represents the average of eight biological replicates, each with 5000 cells. Error bars show SEs. Significance levels are indicated as follows: NS,  $P \geq 0.05$ ; \*,  $P < 0.05$ .

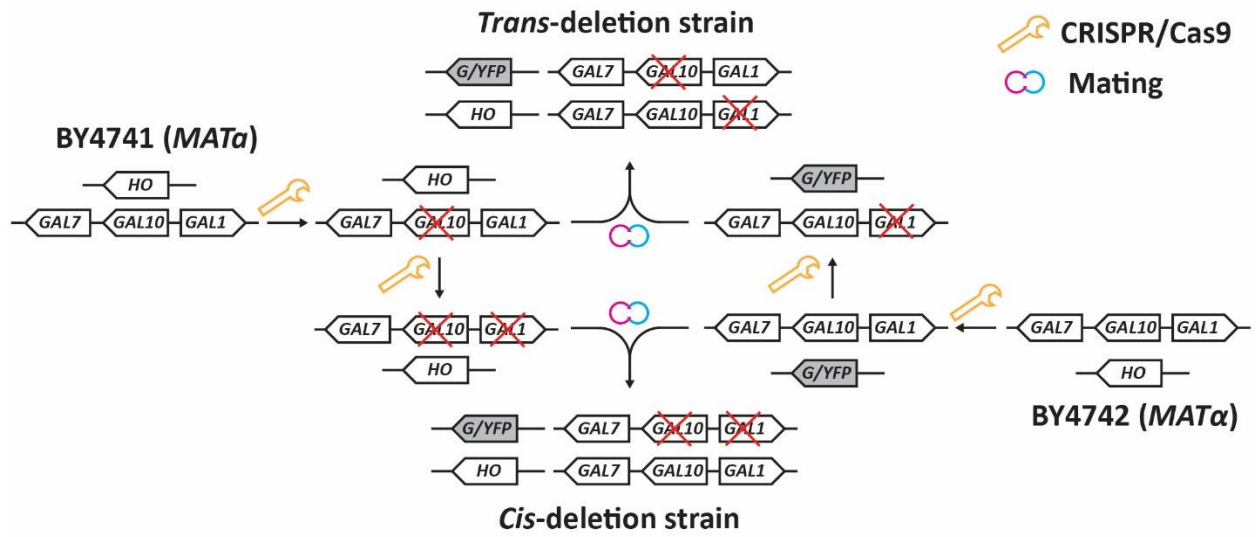

**Fig. S3. Flowchart showing the construction of cis- and trans-deletion strains for the pair of *GAL1* and *GAL10* genes.**

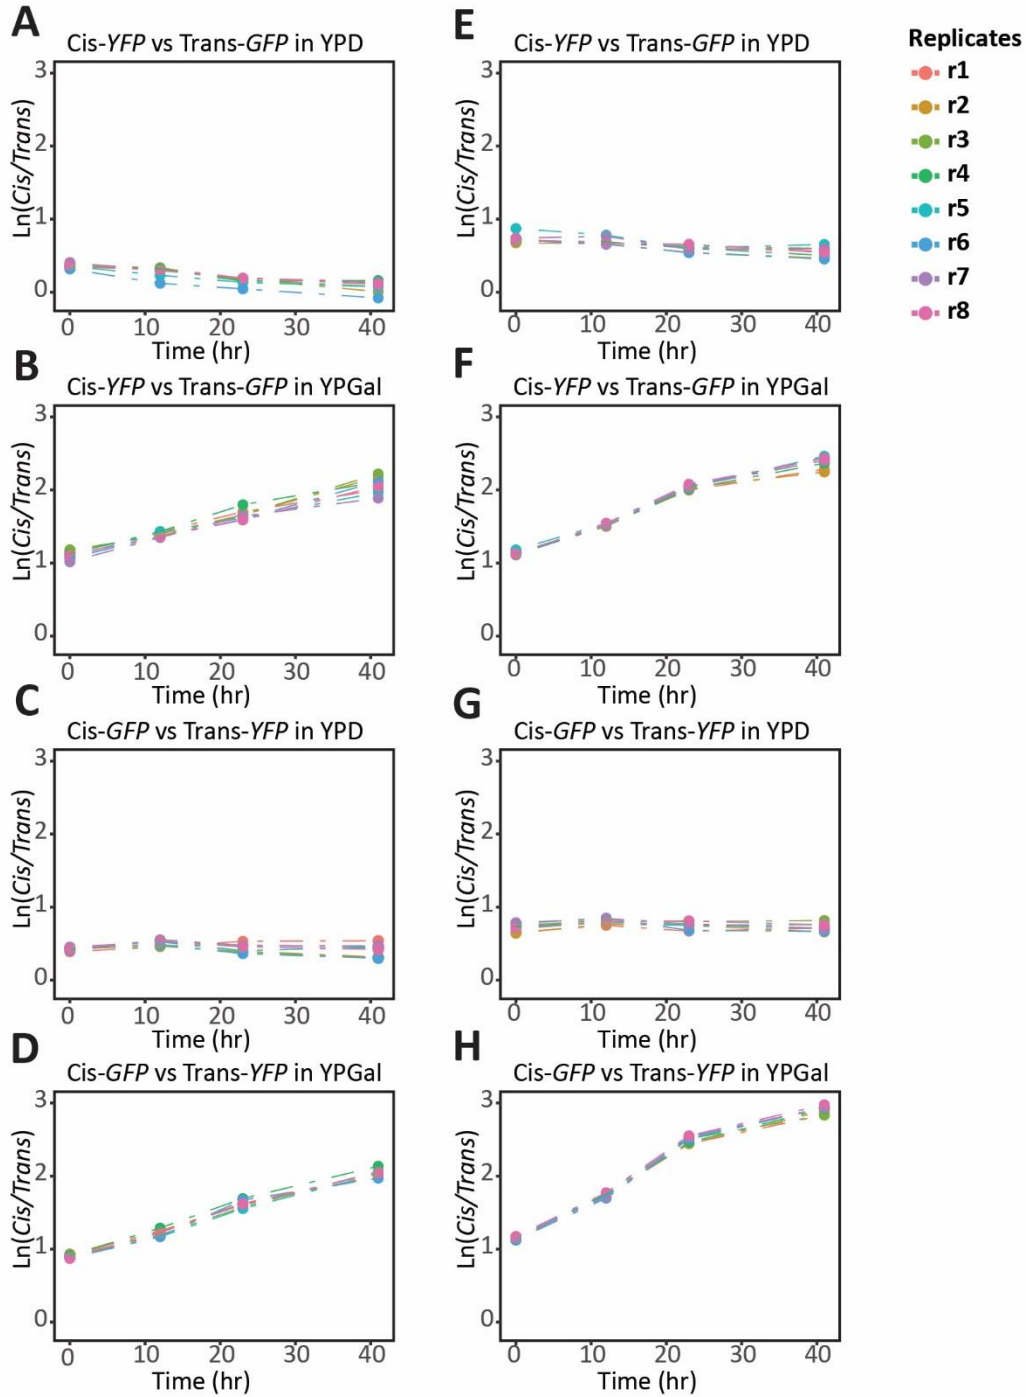

**Fig. S4. Ln(cell number ratio between the cis- and trans-deletion strains) as a function of competition time.** (A to D) Competitions between *cis*- and *trans*-deletion strains involving *GAL1* and *GAL10* gene deletions. (E to H) Competitions between *cis*- and *trans*-deletion strains involving *GAL7* and *GAL10* gene deletions. Note the different competition media used and the variation in the fluorescence marker of each strain.

**Table S1. Parameter values used in the simulation of the linear pathway with two reactions.**

| Parameter  | Value                                        | Explanation                                           |
|------------|----------------------------------------------|-------------------------------------------------------|
| $[M_1]$    | $3.2 \times 10^7$ molecule/cell <sup>a</sup> | Based on the intracellular glucose concentration (46) |
| $k_{cat1}$ | 702 min <sup>-1</sup>                        | From the parameter for Gal1 (47)                      |
| $k_{cat2}$ | 900 min <sup>-1</sup>                        | From the simplified parameter for Gal7 (47)           |
| $K_{m1}$   | $2.3 \times 10^7$ molecule/cell <sup>a</sup> | Based on the parameter for Gal1 (47)                  |
| $K_{m2}$   | $8.6 \times 10^7$ molecule/cell <sup>a</sup> | Based on the simplified parameter for Gal7 (47)       |

<sup>a</sup>The conversion from mM to number of molecules per cell is done by assuming 1 gram of dry cell has a volume of 2.38 ml (48) and a haploid cell weight of  $1.5 \times 10^{-11}$  gram (49). This means one haploid cell has a volume of  $3.57 \times 10^{-14}$  L.

**Table S2. Parameter values used in the simulation of the GAL pathway.**

| Parameter  | Value                                         | Explanation                                                                           |
|------------|-----------------------------------------------|---------------------------------------------------------------------------------------|
| [Gal]      | $8 \times 10^6$ molecule/cell <sup>a</sup>    | Arbitrarily set to enable the simulation to approach equilibrium in a reasonable time |
| [UGl]      | 1976024 molecule/cell <sup>a,b</sup>          | The initial UDP-glucose concentration estimated according to a previous study (50)    |
| [UGa]      | 4023976 molecule/cell <sup>a,b</sup>          | The initial UDP-galactose concentration estimated according to a previous study (50)  |
| $k_{cat1}$ | 3350 min <sup>-1</sup>                        | $k_{cat}$ of the Gal1 reaction from a previous simulation study (51)                  |
| $k_{cat2}$ | 59200 min <sup>-1</sup>                       | $k_{cat}$ of the Gal7 reaction from a previous simulation study (51)                  |
| $k_{cat3}$ | 3890 min <sup>-1</sup>                        | $k_{cat}$ of the Gal10 reaction from a previous simulation study (51)                 |
| $K_{m1}$   | $1.29 \times 10^7$ molecule/cell <sup>a</sup> | $K_m$ in the Gal1 reaction from a previous simulation study (51)                      |
| $K_{m2}$   | $8.6 \times 10^7$ molecule/cell <sup>a</sup>  | $K_m$ for G1P in the Gal7 reaction from a previous simulation study (51)              |
| $K_{m3}$   | $5.6 \times 10^6$ molecule/cell <sup>a</sup>  | $K_m$ for UGl in the Gal7 reaction from a previous simulation study (51)              |
| $K_{m4}$   | $4.73 \times 10^6$ molecule/cell <sup>a</sup> | $K_m$ for UGa in the Gal10 reaction from a previous simulation study (51)             |
| $K_{m5}$   | $5.37 \times 10^6$ molecule/cell <sup>a</sup> | $K_m$ for UGl in the Gal10 reaction from a previous simulation study (51)             |
| $K_{eq}$   | 3.5                                           | Equilibrium constant for the reaction in Eq. (5) in Materials and Methods (51)        |

<sup>a</sup> The conversion from mM to number of molecules per cell is done by assuming that 1 gram of dry cell has a volume of 2.38 ml (48) and that a haploid cell weights  $1.5 \times 10^{-11}$  gram (49). This means one haploid cell has a volume of  $3.57 \times 10^{-14}$  L.

<sup>b</sup> The initial [UGl] and [UGa] are modified so that reactions are at equilibrium when simulation starts



**Table S3. Primers for strain construction.**

| Name  | Sequence (5'→3')                                               | Description                                           |
|-------|----------------------------------------------------------------|-------------------------------------------------------|
| xhq3  | GATCTGAAAACGGTGAACTTACGTTTTAGAGCTAG                            | For <i>GAL10</i> gRNA hybridization                   |
| xhq4  | CTAGCTCTAAAACGTAAGTTTCACCGTTTTTCA                              | For <i>GAL10</i> gRNA hybridization                   |
| xhq5  | GATCTATAGACAGCTGCCCAATGCGTTTTAGAGCTAG                          | For <i>GAL1</i> gRNA hybridization                    |
| xhq6  | CTAGCTCTAAAACGCATTGGGCAGCTGTCTATA                              | For <i>GAL1</i> gRNA hybridization                    |
| xhq7  | ATAGAAAAAATATGATATGAATGAATATTCCACTTTCT<br>TTTTTTGAGGGA         | For <i>GAL7</i> Cas9 deletion's donors hybridization  |
| xhq8  | TCAACATGATAAAAAAAAAACAGTTGAATATTCCTCA<br>AAAAAAGAAAGTG         | For <i>GAL7</i> Cas9 deletion's donors hybridization  |
| xhq9  | ATAGAGTGCATATTTTCAAGAAGGATAGTAAGCTGGC<br>AAATTATATTGAA         | For <i>GAL10</i> Cas9 deletion's donors hybridization |
| xhq10 | ATCCAAAAAAAAAAGTAAGAATTTTTGAAAATTCAATA<br>TAATTTGCCAGCT        | For <i>GAL10</i> Cas9 deletion's donors hybridization |
| xhq11 | ATATACCTCTATACTTTAACGTCAAGGAGAAAAAACT<br>ATAGTATACTTC          | For <i>GAL1</i> Cas9 deletion's donors hybridization  |
| xhq12 | TGAGAAGTTGTTCTGAACAAAGTAAAAAAAAAGAAGTA<br>TACTATAGTTTTTCTCCTTG | For <i>GAL1</i> Cas9 deletion's donors hybridization  |
| xhq13 | TAGGTGCAGGATTTCCATCG                                           | For the confirmation of Cas9 deletion of <i>GAL7</i>  |
| xhq14 | TATACTTCGGAGCACTGTTGAG                                         | For the confirmation of Cas9 deletion of <i>GAL7</i>  |
| xhq15 | TGCTCCGAAGTATAGCTTTCC                                          | For the confirmation of Cas9 deletion of <i>GAL10</i> |
| xhq16 | AGGAGAGTCTTCGTCGGAG                                            | For the confirmation of Cas9 deletion of <i>GAL10</i> |
| xhq17 | GTTCTGAAACGCAGATGTG                                            | For the confirmation of Cas9 deletion of <i>GAL1</i>  |
| xhq18 | GCAGCGGTTGAAAGCATATC                                           | For the confirmation of Cas9 deletion of <i>GAL1</i>  |

|        |                                                                                             |                                                                                     |
|--------|---------------------------------------------------------------------------------------------|-------------------------------------------------------------------------------------|
| xhq19  | TATTAGGTGTGAAACCACGAAAAGT                                                                   | For the confirmation of replacing <i>HO</i> by <i>YFP</i> or <i>GFP</i>             |
| xhq20  | CATGTCTTCTCGTTAAGACTGCAT                                                                    | For the confirmation of replacing <i>HO</i> by <i>YFP</i> or <i>GFP</i>             |
| xhq21  | ACTTTTATTACATAACA<br>TTTAACTAATATACACA<br>TT                                                | For constructing donors for replacing <i>HO</i> by <i>YFP</i> or <i>GFP</i>         |
| xhq22  | CTCATAAGCAGCAATCAATTCTATCTATACTTTAAAA<br>GTGTAAACGCGAAGCTTGCAA                              | For constructing donors for replacing <i>HO</i> by <i>YFP</i> or <i>GFP</i>         |
| xhq23  | GATCGCCGGCTTGATCGACTCAGAGTTTTAGAGCTAG                                                       | For <i>HO</i> gRNA of replacing <i>HO</i> by <i>YFP</i> or <i>GFP</i> hybridization |
| xhq24  | CTAGCTCTAAACTCTGAGTCGATCAAGCCGGC                                                            | For <i>HO</i> gRNA of replacing <i>HO</i> by <i>YFP</i> or <i>GFP</i> hybridization |
| xhq27  | GATCTTGGTTGGTTTTGAATTGTTGTTTTAGAGCTAG                                                       | For <i>GAL7</i> gRNA hybridization                                                  |
| xhq28  | CTAGCTCTAAAACAACAATTCAAACCAACCAA                                                            | For <i>GAL7</i> gRNA hybridization                                                  |
| xhq63  | TGTTCCATACTGGGCCATCTGG                                                                      | For the confirmation of <i>GAL7-FP</i> fusion                                       |
| xhq64  | GTCACTCCGTTCAAGTCGACAACC                                                                    | For the confirmation of <i>GAL7-FP</i> fusion                                       |
| xhq69  | CGGTGATTTCTTGTCTGCTGG                                                                       | For the confirmation of <i>GAL10-FP</i> fusion                                      |
| xhq72  | GCCCTTGCCAATGAGTTCTAC                                                                       | For the confirmation of <i>GAL1-FP</i> fusion                                       |
| xhq90  | TAATAGAAAAAATATGATATGAATGAATATTCCACTTT<br>CTTTAGCTTGCCCTCGTCCCCGC                           | For donors of <i>GAL7-YFP-KanMX</i> fusion                                          |
| xhq92  | AATGAGAAGTTGTTCTGAACAAAGTAAAAAAAAGAAG<br>TATACAGCTTGCCCTCGTCCCCGC                           | For donors of <i>GAL1-YFP-KanMX</i> fusion                                          |
| xhq107 | AGAGTGCATATTTTCAAGAAGGATAGTAAGCTGGCAA<br>A AGCTTGCCCTCGTCCCCGC                              | For donors of <i>GAL10-CFP-NatMX</i> fusion with linker                             |
| xhq120 | TAAACCAGCATTGGGCAGCTGTCTATATGAATTA<br>GGTGACGGTGCTGGTTTAATTAAC<br>TCTAAAGGTGAAGAATTATCACTGG | For donors of <i>GAL1-YFP-KanMX</i> fusion with linker                              |
| xhq121 | TTTAGATGGTCAGATTCATTATCTACAAAGACTG<br>GGTGACGGTGCTGGTTTAATTAAC<br>TCTAAAGGTGAAGAATTATCACTGG | For donors of <i>GAL7-YFP-KanMX</i> fusion with linker                              |
| xhq123 | CGGTGAAACTTACG<br>GGTCCAAGATTGTCTACAGATTTTCC<br>GGTCGACGGATCCCCGGG                          | For donors of <i>GAL10-CFP-NatMX</i> fusion with linker                             |

|        |                                                                     |                                                                 |
|--------|---------------------------------------------------------------------|-----------------------------------------------------------------|
| xhq126 | GATCGTACGGGGACGACGGCGACCGTTTTAGAGCTAG                               | For constructing gRNA for knocking out <i>NatMX</i> coding gene |
| xhq127 | CTAGCTCTAAAACGGTCGCCGTCGTCCCCGTAC                                   | For constructing gRNA for knocking out <i>NatMX</i> coding gene |
| xhq130 | ACTAAAAGATATAGAGTGCATATTTTCAAGAAGGATA<br>GTA AGCTGGCAAACACTATTTGTAC | For constructing donors for deleting <i>NatMX</i> gene          |
| xhq131 | TTGTTACTGCTGCTGGTATTACCCTAGGTATGGATGAA<br>TT GTACAAATAGTTTGCCAGCT   | For constructing donors for deleting <i>NatMX</i> gene          |
| xhq134 | TGACGGTGCTGGTTTAATTAAC                                              | Primer on <i>YFP</i> fusion linker                              |
| xhq135 | GATCCCCGGGTTAATTAACAGT                                              | Primer on <i>CFP</i> fusion linker                              |
| xhq137 | GTACGGGGACGACGGCGACC                                                | For checking guide RNA construction of <i>NatMX</i>             |

---

**Table S4. gRNA target sequences.**

| Guide RNA target | Target sequence      |
|------------------|----------------------|
| <i>GAL10</i>     | TGAAAAACGGTGAAACTTAC |
| <i>GAL1</i>      | TATAGACAGCTGCCCAATGC |
| <i>GAL7</i>      | GCCGGCTTGATCGACTCAGA |
| <i>HO</i>        | TTGGTTGGTTTTGAATTGTT |
| <i>NatMX</i>     | GTACGGGGACGACGGCGACC |

**Table S5. Doubling times for various trans-deletion strains.**

| Strain name                                                          | Medium | Doubling time (hr) <sup>1</sup> |
|----------------------------------------------------------------------|--------|---------------------------------|
| 4743 Trans <i>gal10</i> Δ and <i>gal1</i> Δ <i>HO</i> Δ:: <i>GFP</i> | YPD    | 1.102 ± 0.016                   |
| 4743 Trans <i>gal10</i> Δ and <i>gal1</i> Δ <i>HO</i> Δ:: <i>GFP</i> | YPGal  | 1.458 ± 0.016                   |
| 4743 Trans <i>gal10</i> Δ and <i>gal1</i> Δ <i>HO</i> Δ:: <i>YFP</i> | YPD    | 1.087 ± 0.039                   |
| 4743 Trans <i>gal10</i> Δ and <i>gal1</i> Δ <i>HO</i> Δ:: <i>YFP</i> | YPGal  | 1.461 ± 0.013                   |
| 4743 Trans <i>gal10</i> Δ and <i>gal7</i> Δ <i>HO</i> Δ:: <i>GFP</i> | YPD    | 0.919 ± 0.135                   |
| 4743 Trans <i>gal10</i> Δ and <i>gal7</i> Δ <i>HO</i> Δ:: <i>GFP</i> | YPGal  | 1.616 ± 0.045                   |
| 4743 Trans <i>gal10</i> Δ and <i>gal7</i> Δ <i>HO</i> Δ:: <i>YFP</i> | YPD    | 1.000 ± 0.100                   |
| 4743 Trans <i>gal10</i> Δ and <i>gal7</i> Δ <i>HO</i> Δ:: <i>YFP</i> | YPGal  | 1.607 ± 0.027                   |

<sup>1</sup>Mean ± standard error estimated from five replicates.
